# Supplementary material for: Current Awareness Status of and Recommendations for Polycystic Ovarian Syndrome: A National Cross-Sectional Investigation of Central Jordan
Source: MDPI journal article supplement (doi:10.3390/ijerph20054018), 2023-02-23
Supplement: s1 [file s1]

## Supplementary Tables

**Supplementary Table S1.** Knowledge of PCOS according to field of study

| Item                                                                                                                   | Response     | Field of Study |                |                | P-Value |
|------------------------------------------------------------------------------------------------------------------------|--------------|----------------|----------------|----------------|---------|
|                                                                                                                        |              | No Education   | Non-Medical    | Medical        |         |
|                                                                                                                        |              | <b>n = 161</b> | <b>n = 885</b> | <b>n = 486</b> |         |
| In PCOS, there is an increased level of androgen hormones (testosterone)                                               | No           | 3 (1.9)        | 36 (4.1)       | 18 (3.7)       | <0.001  |
|                                                                                                                        | I don't know | 117 (72.7)     | 645 (72.9)     | 205 (42.2)     |         |
|                                                                                                                        | Yes          | 41 (25.5)      | 204 (23.1)     | 263 (54.1)     |         |
| All patients suffering from PCOS have multiple small cysts in their ovaries                                            | No           | 62 (38.5)      | 364 (41.4)     | 174 (35.8)     | <0.001  |
|                                                                                                                        | I don't know | 72 (44.7)      | 296 (33.4)     | 100 (20.6)     |         |
|                                                                                                                        | Yes          | 27 (16.8)      | 225 (25.4)     | 212 (43.6)     |         |
| Obesity may cause PCOS                                                                                                 | No           | 9 (5.6)        | 63 (7.1)       | 35 (7.2)       | <0.001  |
|                                                                                                                        | I don't know | 56 (34.8)      | 195 (22.0)     | 71 (14.6)      |         |
|                                                                                                                        | Yes          | 96 (59.6)      | 627 (70.8)     | 380 (78.2)     |         |
| Prediabetes condition (due to decreased insulin action in body) may cause PCOS                                         | No           | 14 (8.7)       | 69 (7.8)       | 42 (8.6)       | <0.001  |
|                                                                                                                        | I don't know | 107 (66.5)     | 450 (50.8)     | 152 (31.3)     |         |
|                                                                                                                        | Yes          | 40 (24.8)      | 366 (41.4)     | 292 (60.1)     |         |
| Irregular or absence of menstrual cycle (period) is a symptom of PCOS                                                  | No           | 10 (6.2)       | 16 (1.8)       | 5 (1.0)        | <0.001  |
|                                                                                                                        | I don't know | 55 (34.2)      | 148 (16.7)     | 30 (6.2)       |         |
|                                                                                                                        | Yes          | 96 (59.6)      | 721 (81.5)     | 451 (92.8)     |         |
| Unusual amount of hair growth on different body parts (upper lip, chin, abdomen, breast, ...etc.) is a symptom of PCOS | No           | 11 (6.8)       | 37 (4.2)       | 15 (3.1)       | <0.001  |
|                                                                                                                        | I don't know | 63 (39.1)      | 213 (24.1)     | 48 (9.9)       |         |
|                                                                                                                        | Yes          | 87 (54.0)      | 635 (71.8)     | 423 (87.0)     |         |
| Severe acne problems are a symptom of PCOS                                                                             | No           | 20 (12.4)      | 111 (12.5)     | 49 (10.1)      | <0.001  |
|                                                                                                                        | I don't know | 81 (50.3)      | 335 (37.9)     | 113 (23.3)     |         |
|                                                                                                                        | Yes          | 60 (37.3)      | 439 (49.6)     | 324 (66.7)     |         |

|                                                                  |              |            |            |            |        |
|------------------------------------------------------------------|--------------|------------|------------|------------|--------|
| Unusual amounts of hair loss from the scalp is a symptom of PCOS | No           | 21 (13.0)  | 113 (12.8) | 51 (10.5)  | <0.001 |
|                                                                  | I don't know | 106 (65.8) | 485 (54.8) | 204 (42.0) |        |
|                                                                  | Yes          | 34 (21.1)  | 287 (32.4) | 231 (47.5) |        |
| PCOS diagnosis can be confirmed through an ultrasound            | No           | 10 (6.2)   | 59 (6.7)   | 36 (7.4)   | 0.001  |
|                                                                  | I don't know | 61 (37.9)  | 263 (29.7) | 106 (21.8) |        |
|                                                                  | Yes          | 90 (55.9)  | 563 (63.6) | 344 (70.8) |        |
| Specific blood tests can be used for the diagnosis of PCOS       | No           | 18 (11.2)  | 80 (9.0)   | 35 (7.2)   | <0.001 |
|                                                                  | I don't know | 87 (54.0)  | 394 (44.5) | 110 (22.6) |        |
|                                                                  | Yes          | 56 (34.8)  | 411 (46.4) | 341 (70.2) |        |
| PCOS may lead to diabetes                                        | No           | 35 (21.7)  | 152 (17.2) | 83 (17.1)  | <0.001 |
|                                                                  | I don't know | 102 (63.4) | 517 (58.4) | 191 (39.3) |        |
|                                                                  | Yes          | 24 (14.9)  | 216 (24.4) | 212 (43.6) |        |
| PCOS may lead to weight gain                                     | No           | 14 (8.7)   | 58 (6.6)   | 47 (9.7)   | <0.001 |
|                                                                  | I don't know | 67 (41.6)  | 240 (27.1) | 91 (18.7)  |        |
|                                                                  | Yes          | 80 (49.7)  | 587 (66.3) | 348 (71.6) |        |
| PCOS may lead to pelvic pain                                     | No           | 2 (1.2)    | 42 (4.7)   | 43 (8.8)   | <0.001 |
|                                                                  | I don't know | 54 (33.5)  | 250 (28.2) | 108 (22.2) |        |
|                                                                  | Yes          | 105 (65.2) | 593 (67.0) | 335 (68.9) |        |
| PCOS may lead to heart diseases                                  | No           | 39 (24.2)  | 203 (22.9) | 135 (27.8) | <0.001 |
|                                                                  | I don't know | 111 (68.9) | 601 (67.9) | 266 (54.7) |        |
|                                                                  | Yes          | 11 (6.8)   | 81 (9.2)   | 85 (17.5)  |        |
| PCOS may lead to hypertension                                    | No           | 32 (19.9)  | 159 (18.0) | 112 (23.0) | <0.001 |
|                                                                  | I don't know | 107 (66.5) | 575 (65.0) | 255 (52.5) |        |
|                                                                  | Yes          | 22 (13.7)  | 151 (17.1) | 119 (24.5) |        |
| PCOS may lead to infertility (inability to have children)        | No           | 8 (5.0)    | 92 (10.4)  | 47 (9.7)   | <0.001 |
|                                                                  | I don't know | 57 (35.4)  | 244 (27.6) | 83 (17.1)  |        |
|                                                                  | Yes          | 96 (59.6)  | 549 (62.0) | 356 (73.3) |        |
| PCOS may lead to pregnancy complications (ex: miscarriage)       | No           | 10 (6.2)   | 76 (8.6)   | 38 (7.8)   | <0.001 |

|                                                                            |              |            |            |            |        |
|----------------------------------------------------------------------------|--------------|------------|------------|------------|--------|
|                                                                            | I don't know | 68 (42.2)  | 329 (37.2) | 130 (26.7) |        |
|                                                                            | Yes          | 83 (51.6)  | 480 (54.2) | 318 (65.4) |        |
| PCOS may lead to anxiety/<br>depression/ low self-esteem                   | No           | 14 (8.7)   | 53 (6.0)   | 11 (2.3)   | <0.001 |
|                                                                            | I don't know | 70 (43.5)  | 275 (31.1) | 81 (16.7)  |        |
|                                                                            | Yes          | 77 (47.8)  | 557 (62.9) | 394 (81.1) |        |
| PCOS may lead to early<br>puberty/ menarche                                | No           | 18 (11.2)  | 131 (14.8) | 107 (22.0) | <0.001 |
|                                                                            | I don't know | 118 (73.3) | 575 (65.0) | 262 (53.9) |        |
|                                                                            | Yes          | 25 (15.5)  | 179 (20.2) | 117 (24.1) |        |
| Hormonal therapy may be<br>used to treat PCOS                              | No           | 9 (5.6)    | 25 (2.8)   | 18 (3.7)   | <0.001 |
|                                                                            | I don't know | 88 (54.7)  | 362 (40.9) | 96 (19.8)  |        |
|                                                                            | Yes          | 64 (39.8)  | 498 (56.3) | 372 (76.5) |        |
| Anti-diabetic medications<br>(ex: Glucophage) may be<br>used to treat PCOS | No           | 13 (8.1)   | 33 (3.7)   | 25 (5.1)   | <0.001 |
|                                                                            | I don't know | 90 (55.9)  | 407 (46.0) | 162 (33.3) |        |
|                                                                            | Yes          | 58 (36.0)  | 445 (50.3) | 299 (61.5) |        |
| Surgery may be used to<br>remove the ovarian cysts                         | No           | 5 (3.1)    | 84 (9.5)   | 43 (8.8)   | 0.001  |
|                                                                            | I don't know | 60 (37.3)  | 228 (25.8) | 109 (22.4) |        |
|                                                                            | Yes          | 96 (59.6)  | 573 (64.7) | 334 (68.7) |        |
| Treating PCOS reduces the<br>chance of getting cancer                      | No           | 12 (7.5)   | 85 (9.6)   | 53 (10.9)  | <0.001 |
|                                                                            | I don't know | 100 (62.1) | 494 (55.8) | 219 (45.1) |        |
|                                                                            | Yes          | 49 (30.4)  | 306 (34.6) | 214 (44.0) |        |
| PCOS is an inherited disorder                                              | No           | 53 (32.9)  | 280 (31.6) | 171 (35.2) | <0.001 |
|                                                                            | I don't know | 92 (57.1)  | 462 (52.2) | 194 (39.9) |        |
|                                                                            | Yes          | 16 (9.9)   | 143 (16.2) | 121 (24.9) |        |

Note: PCOS, polycystic ovary syndrome

**Supplementary Table S2.** Knowledge of PCOS according to gender

| Item                                                                                                                   | Response     | Gender      |              | P-value |
|------------------------------------------------------------------------------------------------------------------------|--------------|-------------|--------------|---------|
|                                                                                                                        |              | Male        | Female       |         |
|                                                                                                                        |              | n=175       | n=1357       |         |
| In PCOS, there is an increased level of androgen hormones (testosterone)                                               | No           | 10 (5.7%)   | 47 (3.5%)    | 0.312   |
|                                                                                                                        | I don't know | 106 (60.6%) | 861 (63.4%)  |         |
|                                                                                                                        | Yes          | 59 (33.7%)  | 449 (33.1%)  |         |
| All patients suffering from PCOS have multiple small cysts in their ovaries                                            | No           | 52 (29.7%)  | 548 (40.4%)  | <0.001  |
|                                                                                                                        | I don't know | 87 (49.7%)  | 381 (28.1%)  |         |
|                                                                                                                        | Yes          | 36 (20.6%)  | 428 (31.5%)  |         |
| Obesity may cause PCOS                                                                                                 | No           | 11 (6.3%)   | 96 (7.1%)    | <0.001  |
|                                                                                                                        | I don't know | 77 (44.0%)  | 245 (18.1%)  |         |
|                                                                                                                        | Yes          | 87 (49.7%)  | 1016 (74.9%) |         |
| Prediabetes condition (due to decreased insulin action in body) may cause PCOS                                         | No           | 13 (7.4%)   | 112 (8.3%)   | <0.001  |
|                                                                                                                        | I don't know | 111 (63.4%) | 598 (44.1%)  |         |
|                                                                                                                        | Yes          | 51 (29.1%)  | 647 (47.7%)  |         |
| Irregular or absence of menstrual cycle (period) is a symptom of PCOS                                                  | No           | 10 (5.7%)   | 21 (1.5%)    | <0.001  |
|                                                                                                                        | I don't know | 72 (41.1%)  | 161 (11.9%)  |         |
|                                                                                                                        | Yes          | 93 (53.1%)  | 1175 (86.6%) |         |
| Unusual amount of hair growth on different body parts (upper lip, chin, abdomen, breast, ...etc.) is a symptom of PCOS | No           | 11 (6.3%)   | 52 (3.8%)    | <0.001  |
|                                                                                                                        | I don't know | 89 (50.9%)  | 235 (17.3%)  |         |
|                                                                                                                        | Yes          | 75 (42.9%)  | 1070 (78.9%) |         |
| Severe acne problems are a symptom of PCOS                                                                             | No           | 25 (14.3%)  | 155 (11.4%)  | <0.001  |
|                                                                                                                        | I don't know | 105 (60.0%) | 424 (31.2%)  |         |
|                                                                                                                        | Yes          | 45 (25.7%)  | 778 (57.3%)  |         |
| Unusual amounts of hair loss from the scalp is a symptom of PCOS                                                       | No           | 15 (8.6%)   | 170 (12.5%)  | <0.001  |

|                                                            |              |             |             |        |
|------------------------------------------------------------|--------------|-------------|-------------|--------|
|                                                            | I don't know | 116 (66.3%) | 679 (50.0%) |        |
|                                                            | Yes          | 44 (25.1%)  | 508 (37.4%) |        |
| PCOS diagnosis can be confirmed through an ultrasound      | No           | 12 (6.9%)   | 93 (6.9%)   | 0.001  |
|                                                            | I don't know | 82 (46.9%)  | 348 (25.6%) |        |
|                                                            | Yes          | 81 (46.3%)  | 916 (67.5%) |        |
| Specific blood tests can be used for the diagnosis of PCOS | No           | 13 (7.4%)   | 120 (8.8%)  | 0.001  |
|                                                            | I don't know | 91 (52.0%)  | 500 (36.8%) |        |
|                                                            | Yes          | 71 (40.6%)  | 737 (54.3%) |        |
| PCOS may lead to diabetes                                  | No           | 26 (14.9%)  | 244 (18.0%) | 0.001  |
|                                                            | I don't know | 115 (65.7%) | 695 (51.2%) |        |
|                                                            | Yes          | 34 (19.4%)  | 418 (30.8%) |        |
| PCOS may lead to weight gain                               | No           | 18 (10.3%)  | 101 (7.4%)  | <0.001 |
|                                                            | I don't know | 90 (51.4%)  | 308 (22.7%) |        |
|                                                            | Yes          | 67 (38.3%)  | 948 (69.9%) |        |
| PCOS may lead to pelvic pain                               | No           | 5 (2.9%)    | 82 (6.0%)   | <0.001 |
|                                                            | I don't know | 84 (48.0%)  | 328 (24.2%) |        |
|                                                            | Yes          | 86 (49.1%)  | 947 (69.8%) |        |
| PCOS may lead to heart diseases                            | No           | 27 (15.4%)  | 350 (25.8%) | 0.009  |
|                                                            | I don't know | 128 (73.1%) | 850 (62.6%) |        |
|                                                            | Yes          | 20 (11.4%)  | 157 (11.6%) |        |
| PCOS may lead to hypertension                              | No           | 22 (12.6%)  | 281 (20.7%) | 0.038  |
|                                                            | I don't know | 118 (67.4%) | 819 (60.4%) |        |
|                                                            | Yes          | 35 (20.0%)  | 257 (18.9%) |        |
| PCOS may lead to infertility (inability to have children)  | No           | 6 (3.4%)    | 141 (10.4%) | <0.001 |
|                                                            | I don't know | 74 (42.3%)  | 310 (22.8%) |        |
|                                                            | Yes          | 95 (54.3%)  | 906 (66.8%) |        |
| PCOS may lead to pregnancy complications (ex: miscarriage) | No           | 10 (5.7%)   | 114 (8.4%)  | 0.001  |
|                                                            | I don't know | 83 (47.4%)  | 444 (32.7%) |        |
|                                                            | Yes          | 82 (46.9%)  | 799 (58.9%) |        |

|                                                                            |                 |             |             |        |
|----------------------------------------------------------------------------|-----------------|-------------|-------------|--------|
| PCOS may lead to anxiety/<br>depression/ low self-esteem                   | No              | 6 (3.4%)    | 72 (5.3%)   | <0.001 |
|                                                                            | I don't<br>know | 83 (47.4%)  | 343 (25.3%) |        |
|                                                                            | Yes             | 86 (49.1%)  | 942 (69.4%) |        |
| PCOS may lead to early<br>puberty/ menarche                                | No              | 32 (18.3%)  | 224 (16.5%) | 0.699  |
|                                                                            | I don't<br>know | 110 (62.9%) | 845 (62.3%) |        |
|                                                                            | Yes             | 33 (18.9%)  | 288 (21.2%) |        |
| Hormonal therapy may be<br>used to treat PCOS                              | No              | 12 (6.9%)   | 40 (2.9%)   | <0.001 |
|                                                                            | I don't<br>know | 95 (54.3%)  | 451 (33.2%) |        |
|                                                                            | Yes             | 68 (38.9%)  | 866 (63.8%) |        |
| Anti-diabetic medications<br>(ex: Glucophage) may be<br>used to treat PCOS | No              | 15 (8.6%)   | 56 (4.1%)   | <0.001 |
|                                                                            | I don't<br>know | 110 (62.9%) | 549 (40.5%) |        |
|                                                                            | Yes             | 50 (28.6%)  | 752 (55.4%) |        |
| Surgery may be used to<br>remove the ovarian cysts                         | No              | 11 (6.3%)   | 121 (8.9%)  | 0.001  |
|                                                                            | I don't<br>know | 70 (40.0%)  | 327 (24.1%) |        |
|                                                                            | Yes             | 94 (53.7%)  | 909 (67.0%) |        |
| Treating PCOS reduces the<br>chance of getting cancer                      | No              | 14 (8.0%)   | 136 (10.0%) | 0.052  |
|                                                                            | I don't<br>know | 108 (61.7%) | 705 (52.0%) |        |
|                                                                            | Yes             | 53 (30.3%)  | 516 (38.0%) |        |
| PCOS is an inherited disorder                                              | No              | 33 (18.9%)  | 471 (34.7%) | <0.001 |
|                                                                            | I don't<br>know | 116 (66.3%) | 632 (46.6%) |        |
|                                                                            | Yes             | 26 (14.9%)  | 254 (18.7%) |        |
